# Supplementary material for: Tucatinib Combination Treatment After Trastuzumab-Deruxtecan in Patients With ERBB2-Positive Metastatic Breast Cancer
Source: PubMed Central journal article supplement — JAMA Netw Open. 2024 Apr 3;7(4):e244435. doi: 10.1001/jamanetworkopen.2024.4435 (PMC10993071; doi:10.1001/jamanetworkopen.2024.4435), 2024-04-03
Supplement: jamanetwopen-e244435-s001.pdf [file jamanetwopen-e244435-s001.pdf]

## Data Sharing Statement

Frenel. Tucatinib Combination Treatment After Trastuzumab-Deruxtecan in Patients With *ERBB2*-Positive Metastatic Breast Cancer. *JAMA Netw Open*. Published April 01, 2024.  
doi:10.1001/jamanetworkopen.2024.4435

### Data

**Data available:** No
